# Supplementary material
Source: publisher site journal article supplement (https://www.dovepress.com/article/506115)
Supplement: Supplementary file 1 [file get_supplementary_file.php]

Supplemental File 1: The search strategies for PubMed

| **Database** | **Search Strategies** |
| --- | --- |
| PubMed | #1 Search: ((((((((((Pulmonary Disease, Chronic Obstructive[MeSH Terms]) OR (Chronic Obstructive Lung Disease[Title/Abstract])) OR (Chronic Obstructive Pulmonary Diseases[Title/Abstract])) OR (COAD[Title/Abstract])) OR (COPD[Title/Abstract])) OR (Chronic Obstructive Airway Disease[Title/Abstract])) OR (Chronic Obstructive Pulmonary Disease[Title/Abstract])) OR (Airflow Obstruction, Chronic[Title/Abstract])) OR (Airflow Obstructions, Chronic[Title/Abstract])) OR (Chronic Airflow Obstructions[Title/Abstract])) OR (Chronic Airflow Obstruction[Title/Abstract])  #2 Search: (preserved ratio impaired spirometry[Title/Abstract]) OR (PRISm[Title/Abstract])  #3 Search: #1 and #2 |
